# Supplementary material for: High-Fat Diet Augments VPAC1 Receptor-Mediated PACAP Action on the Liver, Inducing LAR Expression and Insulin Resistance
Source: J Diabetes Res. 2016 Dec 1;2016:9321395. doi: 10.1155/2016/9321395 (PMC5156820; doi:10.1155/2016/9321395)
Supplement: Supplementary file 1 — Supplementary Table 1, related to RT-PCR procedures.Forward and reverse primers used in RT-PCR experiments. [file 9321395.f1.xlsx]

## Sheet: Sheet1
	Primer
Gene	Forward	Reverse
LAR	5'-GGTCAAGGCCTGTAACCCACTAGA-3'	5'-TCCAGCATTGCGTCGATGA-3'
PACAP	5'-TTGCCCGCTGTCCTACTTAGTCAA-3'	5'-GACATCTCTCCTGTCCGCTGGAT-3'
PAC1-R	5'-GGCTGTGCTGAGGCTCTACTTTG-3'	5'-AGGATGATGATGATGCCGATGA-3'
VPAC1-R	5'-CTGCAGCAAGATGTGGGACAA-3'	5'-CTTCAGTGCAGTTACGGCTGATG-3'
VPAC2-R	5'-AAGGACAGCGTGCTCTACTCCAG-3'	5'-TCCACCAGAAGCCAGTAGAAGTTTG-3'
GAPDH	5'-TCCACGACATACTCAGCAC-3'	5'-AACGACCCCTTCATTGAC-3'
